# Supplementary material for: Constitutive and Plastic Gene Expression Variation Associated with Desiccation Resistance Differences in the Drosophila americana Species Group
Source: MDPI journal article supplement (doi:10.3390/genes11020146), 2020-01-30
Supplement: s1 [file s1]

**Table S1.** Additional loci with high between-species variance in plastic responses to desiccation stress in males, as measured by fold-change in expression between control and desiccation treatments. Extension of Table 2. Asterisk denotes also found in female top 20 list (Table 3).

| Gene         | <i>D. novamexicana</i><br>foldchange | <i>D. a. americana</i><br>foldchange | <i>D. a. texana</i><br>foldchange | Flybase/BLAST functional inferences       |
|--------------|--------------------------------------|--------------------------------------|-----------------------------------|-------------------------------------------|
| Cp36         | 0.321928                             | 0                                    | -3.90689                          | Chorion-associated protein                |
| YOgnVI09371  | 0                                    | 3.115477                             | -1.45943                          | Uncharacterized                           |
| CG43134      | -0.43296                             | 2.260528                             | -2.37851                          | Uncharacterized                           |
| YOgnVI04771* | 0                                    | 4.353448                             | 2.943711                          | AttB-like, Activity against gram-bacteria |
| YOgnVI06452  | 0.485427                             | 3.115477                             | -1.1375                           | Uncharacterized                           |
| Vm26Ab       | -0.73697                             | 0.736966                             | -3.48113                          | Vitelline membrane protein family         |
| YOgnVI11671  | 0                                    | 2.938599                             | -1.22239                          | Uncharacterized                           |
| YOgnVI04392  | 1.355134                             | 4.482128                             | 0.487121                          | No match                                  |
| YOgnVI13095  | 0.558442                             | 3.683526                             | -0.08746                          | No match                                  |
| YOgnVI07992  | 0.415037                             | 3.415037                             | -0.41504                          | Peptidase S1 domain protein               |

**Table S2.** Additional loci with high between-species variance in plastic responses to desiccation stress in males, as measured by fold-change in expression between control and desiccation treatments. Extension of Table 3. Asterisk denotes also found in male top 20 list (Table 2).

| Gene         | <i>D. novamexicana</i><br>foldchange | <i>D. a. americana</i><br>foldchange | <i>D. a. texana</i><br>foldchange | Flybase/BLAST functional inferences               |
|--------------|--------------------------------------|--------------------------------------|-----------------------------------|---------------------------------------------------|
| YOgnVI02157  | 0.998                                | -2.906890596                         | -0.321928095                      | Uncharacterized                                   |
| CG3213       | 0.978                                | -2.624490865                         | -2.222392421                      | Outer dense fibre protein 2-related               |
| YOgnVI03138  | 2.484033592                          | 3.598259323                          | -0.211054877                      | Glyco-protein domain                              |
| YOgnVI14951  | -0.118877396                         | -0.456003549                         | 3.092169844                       | Ras-GEF domain-containing protein                 |
| YOgnVI06315  | 2.209453366                          | 3.071462363                          | -0.598186196                      | Alkaline-phosphatase domain                       |
| YOgnVI02327  | -1.364996817                         | 1.73940877                           | 1.983511877                       | Heat-shock protein                                |
| CG13083      | 2.211334015                          | 3.465058103                          | -0.138265238                      | Chorion-associated protein                        |
| YOgnVI06033  | 0.736965594                          | -2.906890596                         | -1.222392421                      | Uncharacterized                                   |
| YOgnVI02034* | 4.523561956                          | 0.959358016                          | 3.169925001                       | Cec2A-like lytic activity against gram- bacteria. |
| YOgnVI05608  | 0.263034406                          | -1.874469118                         | 1.68589141                        | Uncharacterized                                   |
